Correction

# Correction: Prolactin Secretion in Healthy Adults Is Determined by Gender, Age and Body Mass Index

The PLOS ONE Staff

There are errors in Table 3. Please see the corrected Table 3 here.

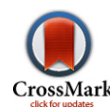

**Table 3.** Prolactin secretion characteristics in premenopausal and postmenopausal women, and men.

|                                | Men         | Premenopausal women | Postmenopausal women | ANOVA P-value | Men vs postmp women. P-value | Premp vs postmp women P-value |
|--------------------------------|-------------|---------------------|----------------------|---------------|------------------------------|-------------------------------|
| BMI                            | 25.2±3.50   | 28.5±6.39           | 25.2±3.67            | 0.12          |                              |                               |
| Pulse frequency (nr/24h)       | 19.5±4.0    | 18.9±4.5            | 21.8±3.1             | 0.13          |                              |                               |
| Slow half-life (min)           | 33.2±7.8    | 34.3±8.3            | 32.4±9.1             | 0.80          |                              |                               |
| Mode day (min)                 | 10.9±5.2    | 10.4±5.1            | 8.1±5.6              | 0.29          |                              |                               |
| Mode night (min)               | 11.2±4.8    | 12.8±6.4            | 10.4±5.4             | 0.92          |                              |                               |
| Basal secretion (µg/L.24h)     | 106±57      | 163±138             | 128±82               | 0.73          |                              |                               |
| Pulsatile secretion (µg/L.24h) | 101±46      | 203±147             | 113±34               | <0.001        | 0.30                         | <0.001                        |
| Total secretion (µg/L.24h)     | 207±82      | 366±188             | 241±82               | <0.001        | 0.31                         | 0.02                          |
| Mean pulse mass (µg/L)         | 5.3±2.53    | 10.6±1.17           | 5.17±1.77            | <0.001        | 0.74                         | 0.001                         |
| Lambda (pulse frequency)       | 18.1±3.6    | 17.6±3.9            | 19.5±3.5             | 0.25          |                              |                               |
| Gamma (regularity, unitless)   | 1.943±0.352 | 2.017±0.433         | 2.138±0.427          | 0.06          |                              |                               |
| ApEn (unitless)                | 1.032±0.314 | 0.930±0.349         | 1.023±0.337          | 0.32          |                              |                               |
| Spikiness (unitless)           | 0.391±0.130 | 0.363±0.143         | 0.381±0.127          | 0.56          |                              |                               |
| Mean 24 h PRL (µg/L)           | 4.35±1.46   | 7.72±3.16           | 5.10±2.09            | <0.001        | 0.27                         | 0.001                         |
| Minimum PRL(µg/L)              | 2.13±1.03   | 3.49±2.16           | 2.52±1.09            | 0.005         | 0.46                         | 0.08                          |
| Maximum PRL (µg/L)             | 10.7±4.04   | 20.3±7.07           | 11.3±4.56            | <0.001        | 0.75                         | <0.001                        |
| Fasting PRL (µg/L)             | 4.18±1.51   | 7.01±5.17           | 3.88±1.42            | 0.001         | 0.48                         | 0.002                         |

Data are shown as mean ± standard deviation. Data were logarithmically transformed before the ANOVA.  
doi:10.1371/journal.pone.0031305.t003

## Reference

1. Roelfsema F, Pijl H, Keenan DM, Veldhuis JD (2012) Prolactin Secretion in Healthy Adults Is Determined by Gender, Age and Body Mass Index. PLoS ONE 7(2): e31305. doi:10.1371/journal.pone.0031305.

**Citation:** The PLOS ONE Staff (2014) Correction: Prolactin Secretion in Healthy Adults Is Determined by Gender, Age and Body Mass Index. PLoS ONE 9(9): e110203. doi:10.1371/journal.pone.0110203

**Published:** September 30, 2014

**Copyright:** © 2014 The PLOS ONE Staff. This is an open-access article distributed under the terms of the Creative Commons Attribution License, which permits unrestricted use, distribution, and reproduction in any medium, provided the original author and source are credited.
